# Supplementary material for: Chemically reduced graphene oxide-P25-Au nanocomposite materials and their photoelectrocatalytic and photocatalytic applications
Source: Royal Society of Chemistry journal article supplement (doi:10.1039/c6pp00118a), 2016-09-06
Supplement: c6pp00118a1.pdf [file c6pp00118a1.pdf]

## Chemically reduced graphene oxide–P25–Au nanocomposite materials and their photoelectrocatalytic and photocatalytic applications

Raju Praveen and Ramasamy Ramaraj\*

Department of Physical Chemistry, School of Chemistry,  
Centre for Photoelectrochemistry, Madurai Kamaraj University,  
Madurai - 625 021, India  
\*ramarajr@yahoo.com

### Supporting Information:

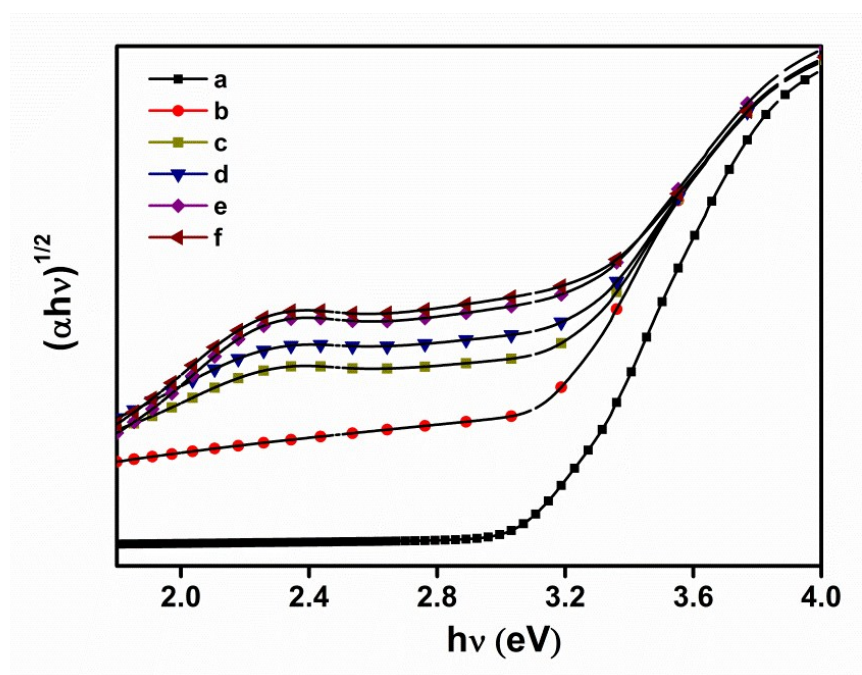

Figure S1. *Tauc's* plots ( $(\alpha h\nu)^{1/2}$  vs  $h\nu$ ) obtained for P25 (a), CRGO–P25 (b), CRGO–P25–Au(0.5) (c), CRGO–P25–Au(1) (d), CRGO–P25–Au(2) (e) and CRGO–P25–Au(3) (f) NCMs.

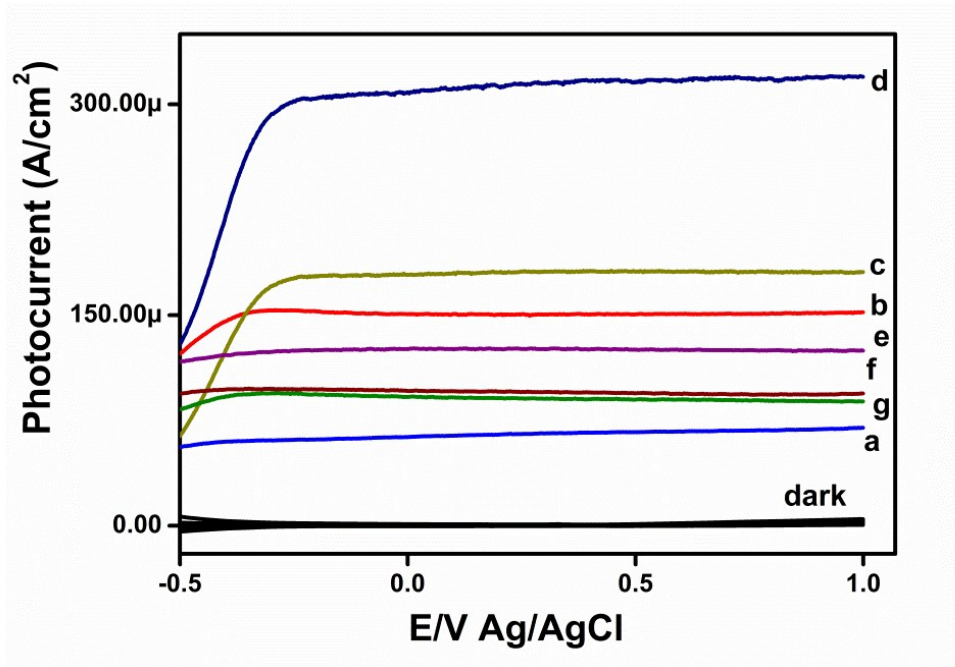

Figure S2. LSV of P25 (a), CRGO-P25 (b), CRGO-P25-Au(0.5) (c), CRGO-P25-Au(1) (d), CRGO-P25-Au(2) (e) and CRGO-P25-Au(3) (f) NCMs modified photoelectrodes under light irradiation and dark condition in a mixture of 0.1 M CH<sub>3</sub>OH in 0.1 M Na<sub>2</sub>SO<sub>4</sub>.

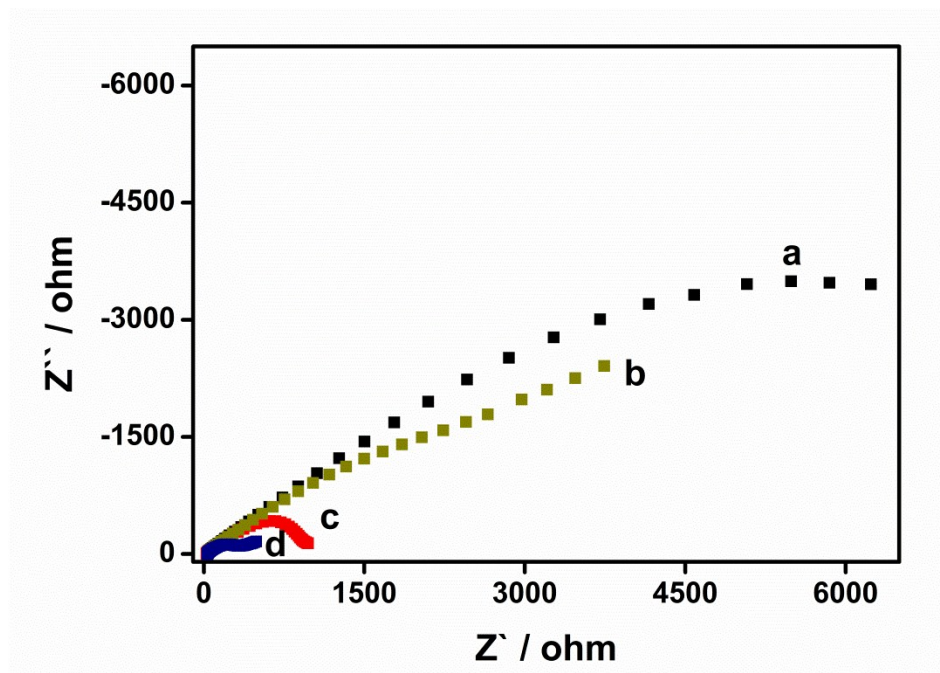

Figure S3. EIS Nyquist plots recorded for P25 (a) and CRGO-P25 (b) modified photoelectrodes under dark and P25 (c), CRGO-P25 (d) under light irradiation condition.

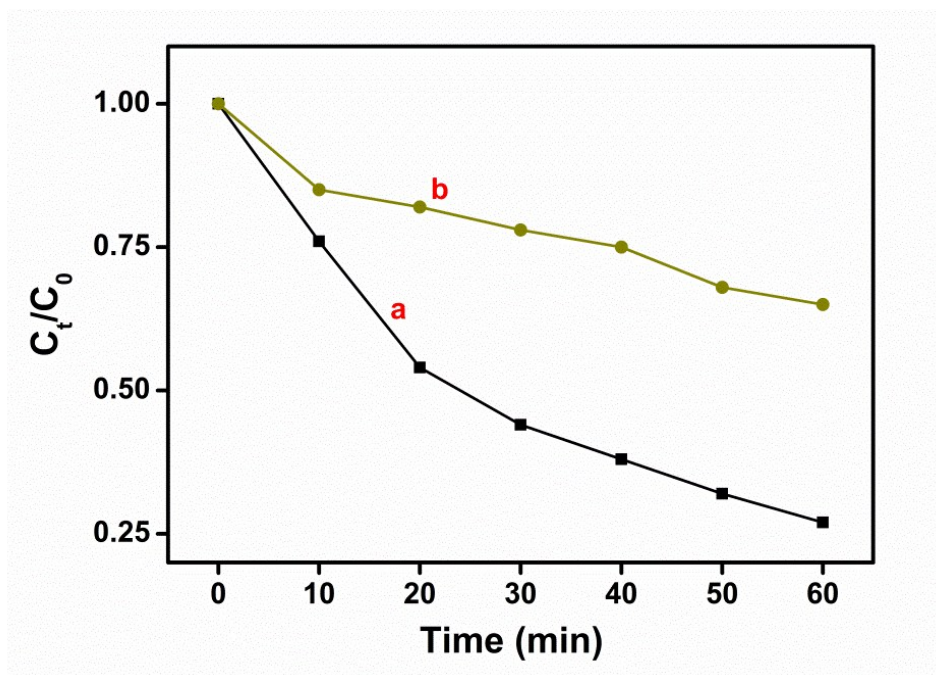

Figure S4. Photocatalytic reduction Cr(VI) ions at CRGO-P25-Au(3) (a) and P25-Au(3) NCMs (b) under light irradiation. Concentration of Cr(VI) ions and OA were 0.4 mM and 4 mM, respectively.
